# Supplementary material
Source: publisher site journal article supplement (https://www.dovepress.com/article/supplementary_file/514475/514475-Supplementary-Table-1.docx)
Supplement: Supplementary file 1 [file 514475-Supplementary-Table-1.docx]

Supplementary Table 1 The gout knowledge questionnaire (GKQ)

| Number of question | Content |
| --- | --- |
| 1 | What causes gout? |
| 2 | How do you know if you have an acute attack of gout? |
| 3 | What inside the joint causes attacks of gout? |
| 4 | Which of these is a good treatment during a sudden painful attack of gout in someone with no other medical condition? |
| 5 | Lowering your blood uric acid can help prevent future attacks of gout. Which of these drugs can lower your blood uric acid? |
| 6 | What is the ideal blood uric acid level to aim for after treatment of gout? |
| 7 | In order to reduce the blood uric acid, what can you do in addition to medications? |
| 8 | If you are taking a drug to lower your blood uric acid levels, how long do you need to take this drug? |
| 9 | When taking a drug to lower your blood uric acid levels, there can be a temporary increase in gouty attacks. How can you prevent such attacks? |
| 10 | Which is a medical condition that is common in patients with gout? |

Notes: Used from Zhang, Li Yun MD*†; Schumacher, H. Ralph MD†; Su, Hou Heng MD‡; Lie, Dai MD§; Dinnella, Janet BS†; Baker, Joshua F. MD†; Von Feldt, Joan M. MD†. Development and Evaluation of a Survey of Gout Patients Concerning Their Knowledge About Gout. Journal of Clinical Rheumatology 17(5):p 242-248, August 2011. <https://journals.lww.com/jclinrheum/abstract/2011/08000/development_and_evaluation_of_a_survey_of_gout.4.aspx>. *Copyright © 2011, © 2011 Lippincott Williams.*15
